# Supplementary material for: Non-SMC Element 2 (NSMCE2) of the SMC5/6 Complex Helps to Resolve Topological Stress
Source: MDPI journal article supplement (doi:10.3390/ijms17111782), 2016-10-26
Supplement: s1 [file s1]

# Supplementary Materials: Non-SMC Element 2 (NSMCE2) of the SMC5/6 Complex Helps to Resolve Topological Stress

Dideke E. Verver, Yi Zheng, Dave Speijer, Ron Hoebe, Henk L. Dekker, Sjoerd Repping, Jan Stap and Geert Hamer

**Table S1.** The selected off-target sites and the corresponding PCR primers.

| Potential Off-Target Sites  | Genomic Loci (GRCh38/hg38)                     | Mis Matches  | PCR Primers                                             |
|-----------------------------|------------------------------------------------|--------------|---------------------------------------------------------|
| ACCCAAATCTGTATCA<br>ACTCAGG | 62065416-62065438,<br>chromosome 11            | 1, 2, 7, 8   | F: GTCCCTCCATCTTGGTGCCT<br>R: GGGTCTTTGCTGCCTGTGA       |
| CTCTTATCCTGTATCAA<br>CTCAAG | 43274942-43274964,<br>chromosome 2             | 1, 4, 5, 7   | F: CACTGACAACAGGCATGAAAT<br>R: CTGGAGACTGAGGCAGGAGA     |
| TTTCTATTCTGTATCAA<br>CTCAAG | 153197613-153197635,<br>chromosome 7           | 3, 5, 7, 8   | F: ATTGGGCCTTATGAACTGATTC<br>R: TGGTCTACGCAGGGTAAGGATA  |
| TGCCAAGGCTGTATGA<br>ACTCAGG | 110987269-110987291,<br>chromosome 2 (in gene) | 2, 8, 15     | F: ACTGCTTGGAAACAGTGAACATG<br>R: GCTGAGACTGATGAGCGATAAA |
| TCCAAAGTCTGTATCA<br>ACTTTAG | 2809500-2809522,<br>chromosome 8               | 2, 4, 8, 20  | F: CAGCCAAACCATATCATTCTGT<br>R: TGTTTTCATGTTTGTCGAGTG   |
| TTCCAAGACTATATCA<br>ACTAAAG | 114757228-114757250,<br>chromosome 11          | 8, 11, 20    | F: GTATTGCAGCAAGCCATTACC<br>R: AAGAATCTGCTCTGGAGGGAG    |
| TTCTGGCCTGTATCA<br>ACACAAG  | 52436381-52436403,<br>chromosome 12            | 5, 6, 19     | F: ACGGAACCAGGTGAAGGAA<br>R: TTGGCACTTGGAGCGGTAG        |
| TTTGAAGTCTGTATCAT<br>CTCAAG | 104356169-104356191,<br>chromosome 5           | 3, 4, 8, 17  | F: CACTCTTACTTTGTTCCCCACA<br>R: CCTCACTTGCCTTGCTATT     |
| TACTAAACATGTATCA<br>ACTCAGG | 31343808-31343830,<br>chromosome X             | 2, 4, 7, 9   | F: GCTGGCGGGTGCAATTAGT<br>R: AGAGCAAGACCCTGACCCTAA      |
| GCCCAAGCCAGTATCA<br>CCTCAAG | 128369750-128369772,<br>chromosome 5           | 1, 2, 10, 17 | F: CGGAAAGTGGGAGTAAGAAATC<br>R: GCTCTAATCACTGGCTATGCTAT |

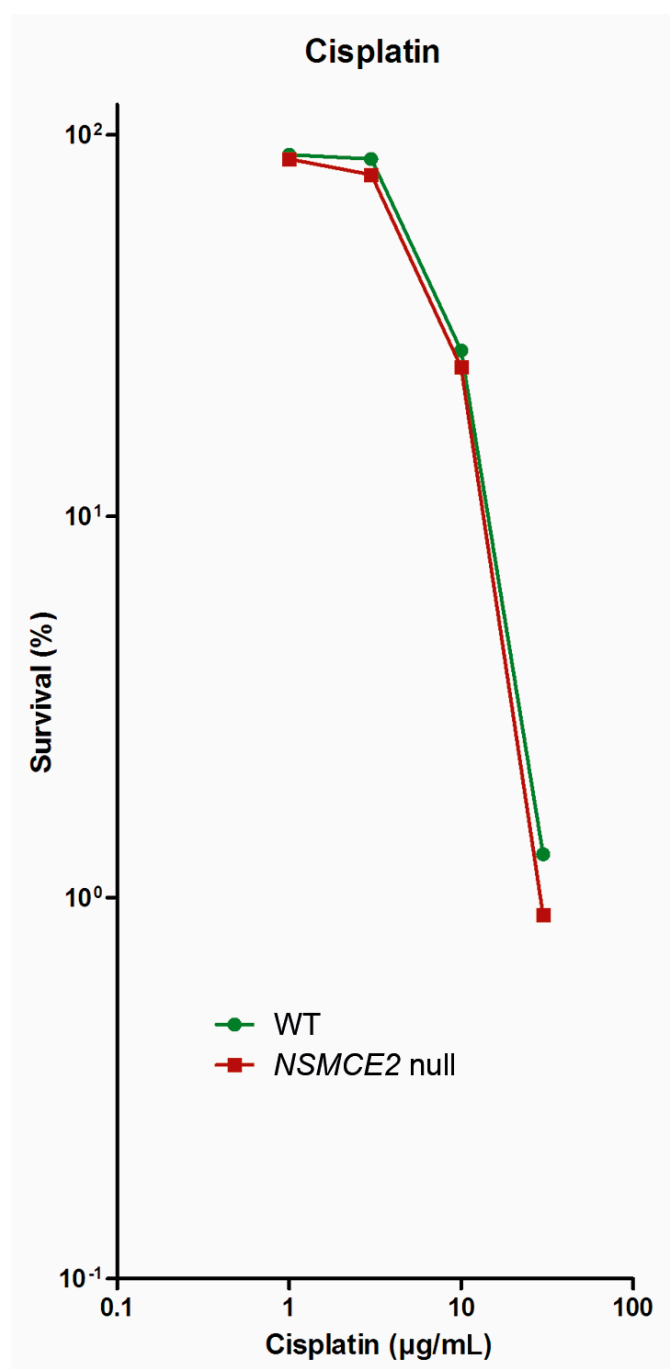

**Figure S1.** Clonogenic assay after increasing doses of cisplatin. No clear difference in sensitivity to cisplatin could be detected between WT and *NSMCE2* null cells.
